# Supplementary material for: Signal-on fluorescent sensor based on GQDs–MnO2 composite for glutathione
Source: Royal Society of Chemistry journal article supplement (doi:10.1039/c5ay03108g), 2016-01-01
Supplement: c5ay03108g1.pdf [file c5ay03108g1.pdf]

**Electronic Supplementary Material**

**Signal-on fluorescent sensor based on GQDs–MnO<sub>2</sub> composites for glutathione**

Zongen Liu<sup>a,1</sup>, Xiaohui Cai<sup>a,1</sup>, Xuefang Lin<sup>b</sup>, Yanjie Zheng<sup>a</sup>, Yangting Wu<sup>a</sup>,  
Pingping Chen<sup>a</sup>, Shaohuang Weng<sup>a,\*</sup>, Liqing Lin<sup>a,\*</sup>, Xinhua Lin

a: Department of Pharmaceutical Analysis, Faculty of Pharmacy, the higher educational key laboratory for Nano Biomedical Technology of Fujian Province, Fujian Medical University, Fuzhou 350108, China

b: Department of Pharmacology, Faculty of Pharmacy, Fujian Medical University, Fuzhou 350108, China

---

Corresponding author: Weng, S., E-mail: [shweng@fjmu.edu.cn](mailto:shweng@fjmu.edu.cn), Lin, L., E-mail: [fjmu\\_lin@126.com](mailto:fjmu_lin@126.com), Tel./fax: +86 591 22862016.

1. Liu and Cai contributed equally to this work.

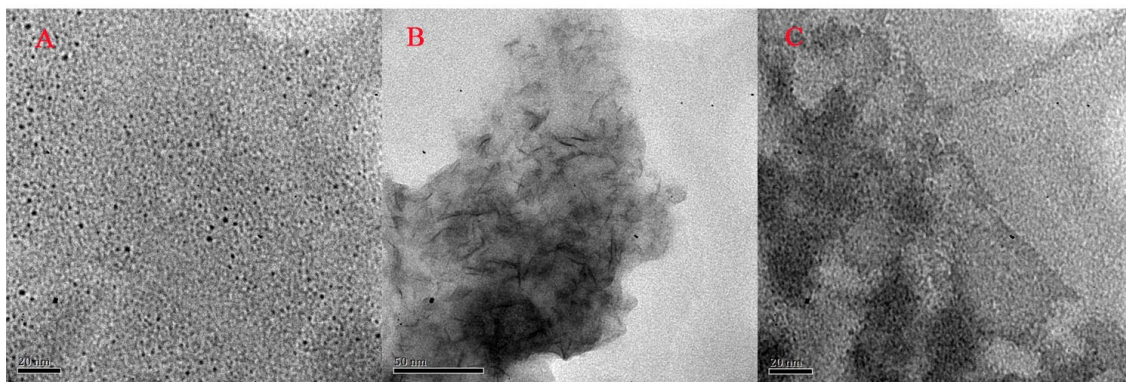

Fig. S1 TEM images of GQDs (A), MnO<sub>2</sub> (B) and GQDs-MnO<sub>2</sub> composites (C).

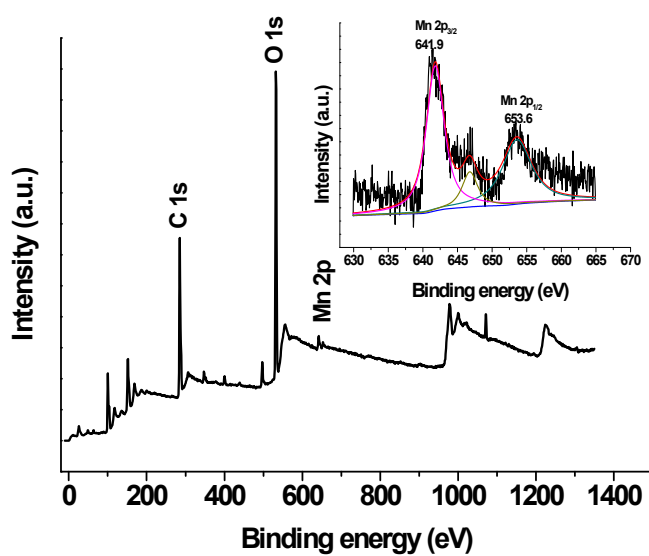

Fig.S2 The XPS survey spectrum of GQDs-MnO<sub>2</sub> composites. The inset shows the narrow XPS spectra of the Mn 2p peaks of the composites.

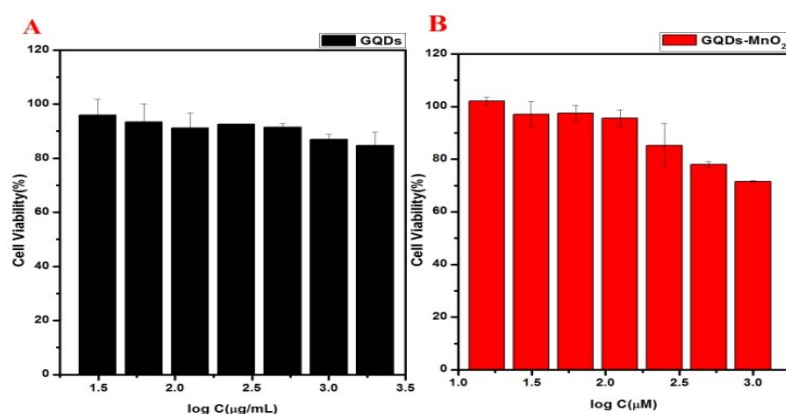

Fig. S3 Cell viability of HL-60 cell in different concentrations of GQDs (A) and different concentrations of GQDs-MnO<sub>2</sub> composites (B) by MTT assay.

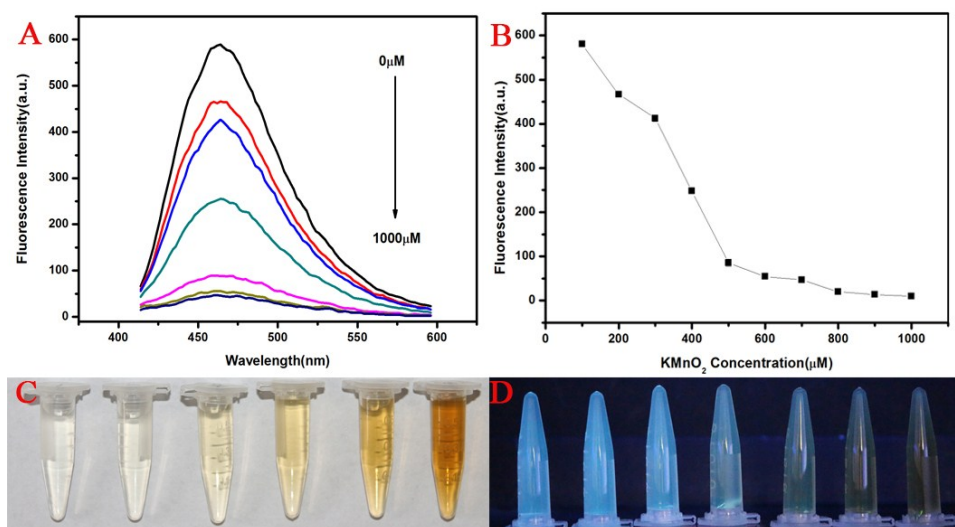

Fig. S4 (A) Fluorescence spectra of GQDs-MnO<sub>2</sub> composites prepared from different concentrations of original KMnO<sub>4</sub>; (B) The variable fluorescence intensities of GQDs-MnO<sub>2</sub> composites with increasing concentrations of KMnO<sub>4</sub>; The photograph of GQDs-MnO<sub>2</sub> composites prepared from increasing concentrations of KMnO<sub>4</sub> under air environment (C) and UV excited (D).

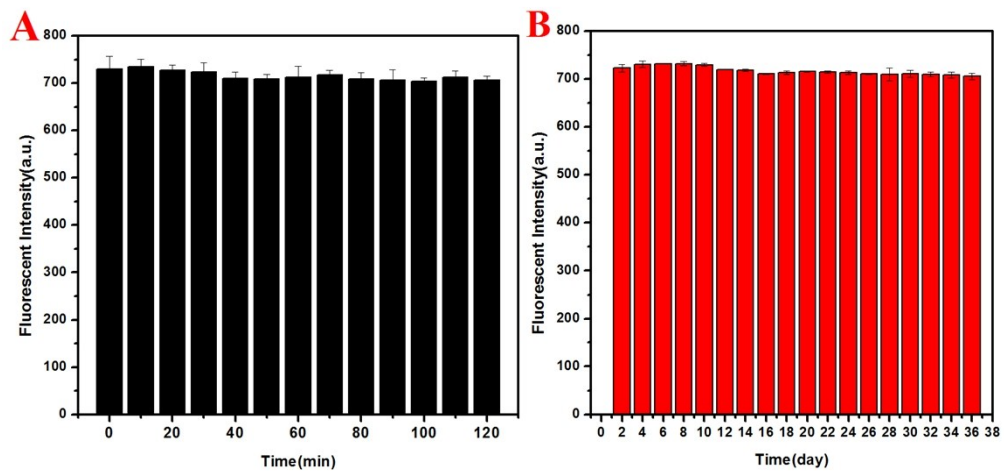

Fig. S5 (A) The stability of GQDs continuous irradiation under UV 365 nm for 120 min; (B) The stability of GQDs stored in a refrigerator at 4 °C for 38-day

Table.S1 Comparison of the sensing results of the present work with corresponding GSH sensors

| <b>Probe</b>                                                                         | <b>Method</b> | <b>Linear range</b> | <b>LOD</b>    | <b>Real samples</b>                                                          | <b>Reference in manuscript</b> |
|--------------------------------------------------------------------------------------|---------------|---------------------|---------------|------------------------------------------------------------------------------|--------------------------------|
| Ag <sup>+</sup> -TMB                                                                 | colorimetry   | 0.05-8 $\mu$ M      | 0.05 $\mu$ M  | Human urine and fatal calf serum                                             | [9]                            |
| MnO <sub>2</sub> NPs–TMB                                                             | colorimetry   | 0.26–26 mM          | 0.1 mM        | Human blood                                                                  | [11]                           |
| Rhodamin B - AuNPs                                                                   | Fluorimetry   | 12-1384 $\mu$ M     | 1.0 $\mu$ M   | hepG2                                                                        | [14]                           |
| N-(4-(1,5-diphenyl-4,5-dihydro-1H-pyrazol-3-yl)phenyl)-2,4-dinitrobenzenesulfonamide | Fluorimetry   | 10-180 $\mu$ M      | 0.411 $\mu$ M | Calf serum                                                                   | [33]                           |
| CdTe-MPA-DA                                                                          | Fluorimetry   | 0.01-10 $\mu$ M     | 6.5 nM        | Fetal bovine serum and human urine                                           | [36]                           |
| GQDs-MnO <sub>2</sub>                                                                | Fluorimetry   | 1-1000 $\mu$ M      | 0.45 $\mu$ M  | Fatal calf serum, Reduced Glutathione injection, Reduced Glutathione Tablets | This work                      |
